# Supplementary material
Source: PubMed Central journal article supplement (PMC5010965)
Supplement: NIHMS805449-supplement-1.pdf [file NIHMS805449-supplement-1.pdf]

**Figure S1.**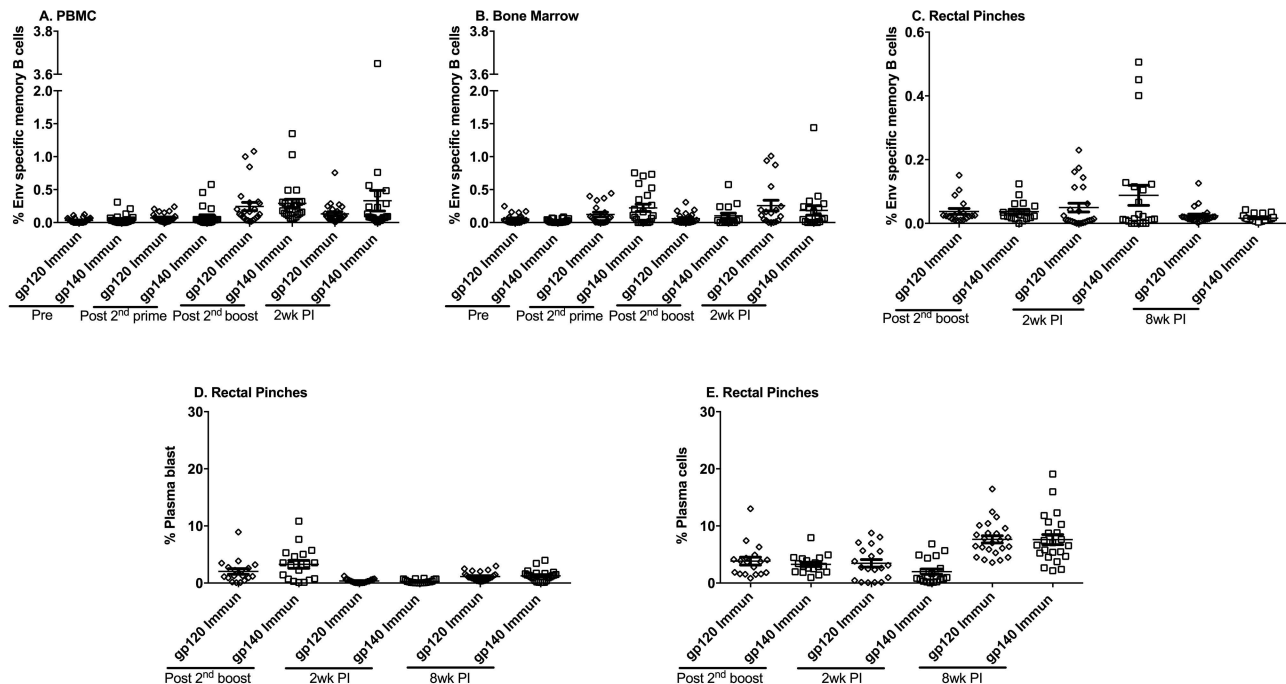

**Supplementary Figure 1. Env-specific memory B cells, PB, and PC in various tissues by immunization group.** PBMC (A), BM (B), and rectal biopsies (C) obtained at the indicated time points were assayed for Env-specific memory B cells and the data are presented according to either gp120 or gp140 immunization group. Rectal biopsies obtained at the indicated time points were assayed for PB (D) and PC (E) and are plotted according to immunization group. Data are presented as means ± SEM.

Figure S2.

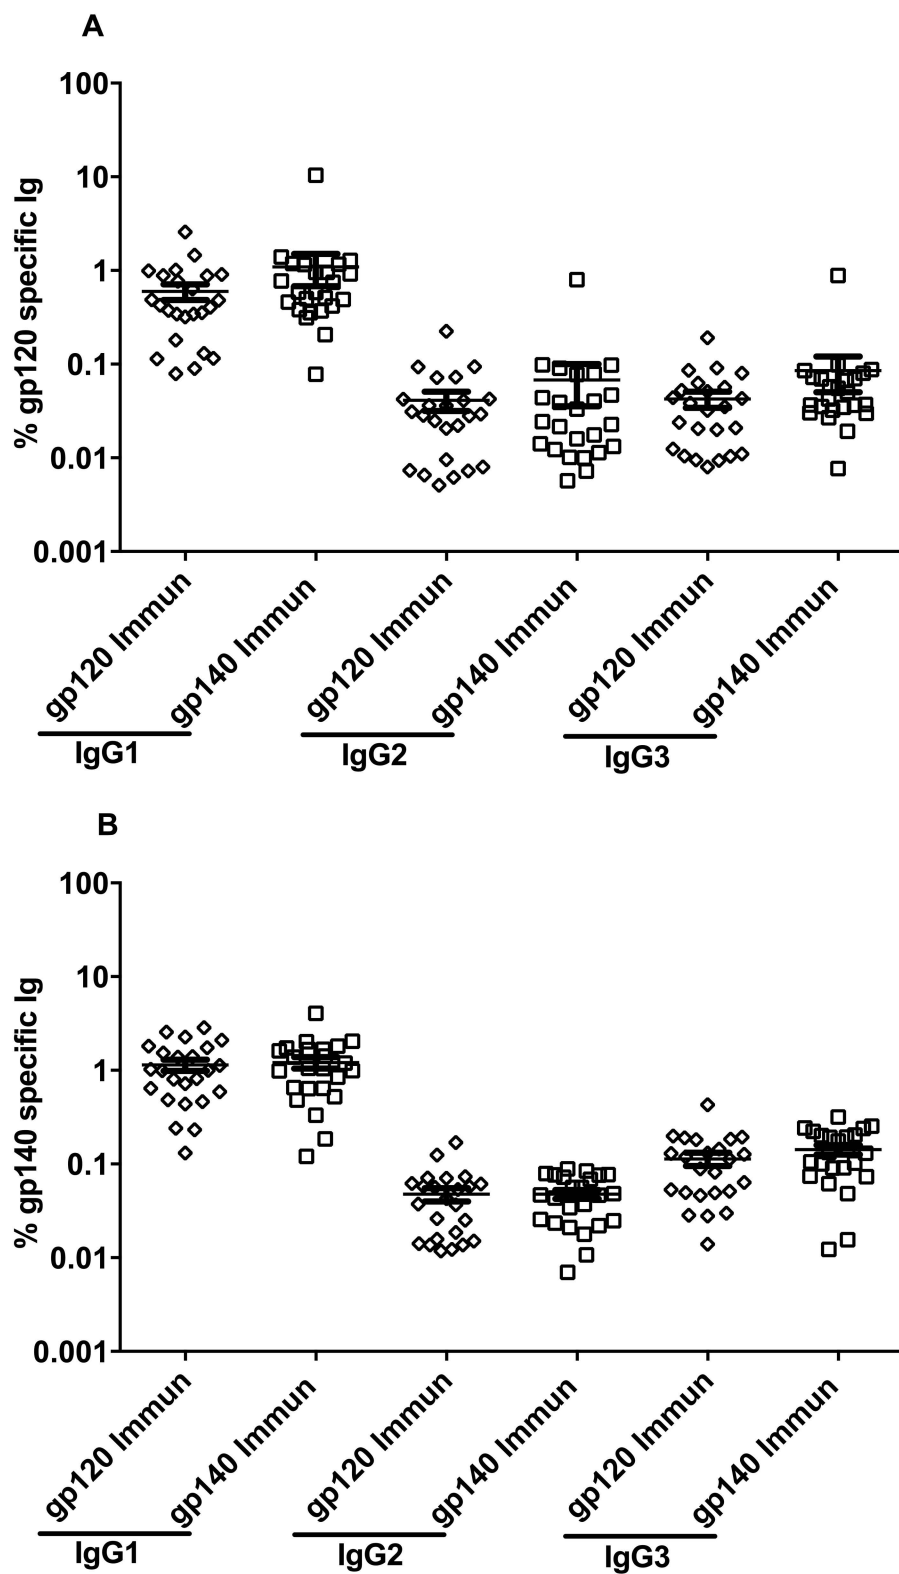

**Supplementary Figure 2. Percentages of IgG subclass antibodies analyzed by immunization group.** Sera obtained 2 weeks after the second protein boost were assayed for gp120- (A) and gp140-specific (B) IgG1, IgG2, and IgG3 antibodies, expressed as percentages of pan IgG antibody, and plotted by immunization group. Data shown are means  $\pm$  SEM.
